# Supplementary material for: Identification of circo-like virus-Brazil genomic sequences in raw sewage from the metropolitan area of São Paulo: evidence of circulation two and three years after the first detection
Source: PubMed Central journal article supplement (PMC5319365; doi:10.1590/0074-02760160312), 2017-01-30
Supplement: 0074-0276-mioc-0074-02760160312-suppl01.pdf [file 0074-0276-mioc-0074-02760160312-suppl01.pdf]

TABLE  
 Top five BLASTx hits excluding viruses (taxid: 10239)  
 obtained for circo-like virus-Brazil sew p6, sew p9, hsl, hs2 (on January 21, 2016)

| Query sequence submitted to BLASTx search / Results                                     | Query coverage | E value | Identity | GenBank accession number |
|-----------------------------------------------------------------------------------------|----------------|---------|----------|--------------------------|
| Query sequence                                                                          |                |         |          |                          |
| CLV-BR sew p6 - ORF 3 - nt: 63-716                                                      |                |         |          |                          |
| Putative replication-associated protein REP2 ( <i>Giardia intestinalis</i> )            | 96%            | 2e-22   | 31%      | AAF28772                 |
| Replication association protein ( <i>Hymenolepis microstoma</i> )                       | 77%            | 5e-22   | 36%      | CDS32196                 |
| RNA helicase ( <i>Giardia intestinalis</i> )                                            | 96%            | 9e-22   | 31%      | ESU34896                 |
| Replication-associated protein REP1, putative ( <i>Giardia intestinalis</i> ATCC 50581) | 96%            | 9e-20   | 35%      | EES99726                 |
| Replicase ( <i>Gregarina niphandrodes</i> )                                             | 96%            | 9e-20   | 32%      | XP_011133935             |
| Query sequence                                                                          |                |         |          |                          |
| CLV-BR sew p9 - ORF 3 - nt: 635-1288                                                    |                |         |          |                          |
| Putative replication-associated protein REP2 ( <i>Giardia intestinalis</i> )            | 96%            | 2e-22   | 31%      | AAF28772                 |
| Replication association protein ( <i>Hymenolepis microstoma</i> )                       | 77%            | 5e-22   | 36%      | CDS32196                 |
| RNA helicase ( <i>Giardia intestinalis</i> )                                            | 96%            | 9e-22   | 31%      | ESU34896                 |
| Replication-associated protein REP1, putative ( <i>Giardia intestinalis</i> ATCC 50581) | 96%            | 9e-20   | 35%      | EES99726                 |
| Replicase ( <i>Gregarina niphandrodes</i> )                                             | 96%            | 9e-20   | 32%      | XP_011133935             |
| Query sequence                                                                          |                |         |          |                          |
| CLV-BR hsl - ORF 3 - nt: 1662-2525                                                      |                |         |          |                          |
| Replication association protein ( <i>Hymenolepis microstoma</i> )                       | 80%            | 2e-37   | 38%      | CDS32196                 |
| Replication-associated protein REP1, putative ( <i>Giardia intestinalis</i> ATCC 50581) | 98%            | 2e-31   | 33%      | EES99726                 |
| Rep protein, putative ( <i>Giardia intestinalis</i> ATCC 50581)                         | 98%            | 4e-31   | 33%      | EES99432                 |
| RNA helicase ( <i>Giardia intestinalis</i> )                                            | 90%            | 5e-31   | 35%      | ESU40270                 |
| Putative replication-associated protein REP2 ( <i>Giardia intestinalis</i> )            | 89%            | 1e-30   | 32%      | AAF28772                 |
| Query sequence                                                                          |                |         |          |                          |
| CLV-BR hs2 - ORF 3 - nt: 1669-2532                                                      |                |         |          |                          |
| Replication association protein ( <i>Hymenolepis microstoma</i> )                       | 80%            | 5e-38   | 38%      | CDS32196                 |
| Replication-associated protein REP1, putative ( <i>Giardia intestinalis</i> ATCC 50581) | 98%            | 5e-31   | 33%      | EES99726                 |
| Putative replication-associated protein REP2 ( <i>Giardia intestinalis</i> )            | 89%            | 2e-30   | 31%      | AAF28772                 |
| RNA helicase ( <i>Giardia intestinalis</i> )                                            | 90%            | 2e-30   | 35%      | ESU40270                 |
| Putative replication associated protein ( <i>Gregarina niphandrodes</i> )               | 85%            | 2e-30   | 35%      | Xp_011133866             |

ORF: open reading frame; Rep: replication initiator protein.
